# Supplementary material
Source: publisher figshare collection journal article supplement (https://acs.figshare.com/ndownloader/files/5187535)
Supplement: Supplementary file 1 [file 5187535]

#===============================================================================
data_global
#===============================================================================

# 1. SUBMISSION DETAILS

_publ_contact_author       #Name and address of author for correspondence
;
 ?
;
_publ_contact_author_phone     ?
_publ_contact_author_fax       ?
_publ_contact_author_email     ?

_publ_requested_journal         ?
_publ_requested_coeditor_name  ?

_publ_contact_letter
;
 ? #Insert text if wanted
;

#===============================================================================

# 2. PROCESSING SUMMARY  (IUCr Office Use Only)

_journal_date_recd_electronic  ?
_journal_date_to_coeditor      ?
_journal_date_from_coeditor    ?
_journal_date_accepted         ?
_journal_date_printers_first   ?
_journal_date_printers_final   ?
_journal_date_proofs_out       ?
_journal_date_proofs_in        ?
_journal_coeditor_name         ?
_journal_coeditor_code         ?
_journal_coeditor_notes
; ?
;
_journal_techeditor_code       ?
_journal_techeditor_notes
; ?
;
_journal_coden_ASTM            ?
_journal_name_full             ?
_journal_year                  ?
_journal_volume                ?
_journal_issue                 ?
_journal_page_first            ?
_journal_page_last             ?
_journal_suppl_publ_number      ?
_journal_suppl_publ_pages       ?

#===============================================================================

# 3. TITLE AND AUTHOR LIST

_publ_section_title
;
 ? #Insert chemical title here
;
# The loop structure below should contain the names and addresses of all
# authors, in the required order of publication. Repeat as necessary.

loop_
        _publ_author_name
        _publ_author_address
' ?'    #<--'Last name, first name
' ?'
#===============================================================================

# 4. TEXT
_publ_section_abstract
;
 ?  #Insert appropriate text here if wanted.
;
_publ_section_comment
;
 ?  #Insert appropriate text here if wanted.
;
_publ_section_experimental
;
 ?  #Insert appropriate text here if wanted.
;
_publ_section_references
;
 Gabe, E.J., Le Page, Y., Charland,.J.-P., Lee, F.L. and White, P.S.
 (1989) J. Appl. Cryst., 22, 384-387.

 Flack, H., (1983) Acta Cryst., A39, 876-881.

 International Tables for X-ray Crystallography, Vol. IV, (1974)
 Kynoch Press, Birmingham, England.

 Johnson, C.K., (1976) ORTEP - A Fortran Thermal Ellipsoid Plot
 Program, Technical Report ORNL-5138, Oak Ridge National Lab., U.S.A.

 Larson, A.C., (1970) p.293, Crystallographic Computing, Munksgaard,
 Copenhagen.

 Le Page, Y., (1988) J. Appl. Cryst., 21, 983-984.

 Le Page, Y. and Gabe, E.J., (1979) J. Appl. Cryst., 12, 464-466.

 Rogers, D., (1981) Acta Cryst., A37, 734-741.

 ?  #Insert any other references here
;
_publ_section_figure_captions
;
 ?  #Insert figure captions here if wanted
;
_publ_section_acknowledgements
;
 ?  #Insert any acknowledgements here.
;

#===============================================================================

# If more than one structure is reported, sections 5-10 should be filled in
# per structure.  For each data set, replace the ? in the data_? line below
# by a unique identifier.

data_c03093

#===============================================================================

# 5. CHEMICAL DATA

_chemical_name_systematic
;
 ?  #Insert the chemical name here.
;
_chemical_name_common             ?
_chemical_formula_moiety         'C25 H26 Cl N O4 '
_chemical_formula_structural     ?
_chemical_formula_analytical     ?
_chemical_formula_sum            'C25 H26 Cl N O4 '
_chemical_formula_weight         439.93
_chemical_compound_source        ?

loop_
     _atom_type_symbol
     _atom_type_description
     _atom_type_scat_dispersion_real
     _atom_type_scat_dispersion_imag
     _atom_type_scat_source
  C     ?  0.003  0.002 'International Tables Vol. IV Table 2.2B'
  H     ?  0.000  0.000 'International Tables Vol. IV Table 2.2B'
  Cl    ?  0.148  0.159 'International Tables Vol. IV Table 2.2B'
  N     ?  0.006  0.003 'International Tables Vol. IV Table 2.2B'
  O     ?  0.011  0.006 'International Tables Vol. IV Table 2.2B'

#===============================================================================

# 6. CRYSTAL DATA

_symmetry_cell_setting            Monoclinic   
_symmetry_space_group_name_H-M    'P 21/c'

loop_
     _symmetry_equiv_pos_as_xyz

   x,y,z
   -x,-y,-z
   -x,1/2+y,1/2-z
   x,1/2-y,1/2+z
_cell_length_a                      9.6148(19)
_cell_length_b                     14.361(3)
_cell_length_c                     15.621(3)
_cell_angle_alpha                  90.0
_cell_angle_beta                   91.421(1)
_cell_angle_gamma                  90.0
_cell_volume                     2156.2(8)
_cell_formula_units_Z               4
_cell_measurement_temperature      173
_cell_measurement_reflns_used    4245
_cell_measurement_theta_min         2.50
_cell_measurement_theta_max        28.00
_cell_special_details
;
 ?  #Insert any comments here.
;
_exptl_crystal_description        block
_exptl_crystal_colour             clear
_exptl_crystal_size_max           0.35
_exptl_crystal_size_mid           0.30
_exptl_crystal_size_min           0.30
_exptl_crystal_size_rad           ?
_exptl_crystal_density_meas       ?
_exptl_crystal_density_diffrn     1.355
_exptl_crystal_density_method     ?
_exptl_crystal_F_000              929.12
_exptl_absorpt_coefficient_mu     0.21
_exptl_absorpt_correction_type    none
_exptl_absorpt_correction_T_min   1.0000
_exptl_absorpt_correction_T_max   1.0000

#===============================================================================

# 7. EXPERIMENTAL DATA

_exptl_special_details
;
 ?  #Insert any special details here.
;

_diffrn_ambient_temperature      173
_diffrn_radiation_wavelength     0.71073
_diffrn_radiation_type           'Molybdenum K\a'
_diffrn_radiation_source         'xray tube'

_diffrn_radiation_monochromator  graphite
_diffrn_measurement_device       'Bruker SMART 1K'
_diffrn_measurement_method       'Omega scans'
_diffrn_standards_number         ?
_diffrn_standards_interval_count ?
_diffrn_standards_interval_time  ?
_diffrn_standards_decay_%        ?
loop_
     _diffrn_standard_refln_index_h
     _diffrn_standard_refln_index_k
     _diffrn_standard_refln_index_l
    ?   ?   ?

_diffrn_reflns_number            20074
_diffrn_reflns_av_R_equivalents  0.039
_diffrn_reflns_av_sigmaI/netI    ?
_diffrn_reflns_limit_h_min      -12
_diffrn_reflns_limit_h_max       12
_diffrn_reflns_limit_k_min        0
_diffrn_reflns_limit_k_max       19
_diffrn_reflns_limit_l_min        0
_diffrn_reflns_limit_l_max       20
_diffrn_reflns_theta_min         0.00
_diffrn_reflns_theta_max        28.00
_diffrn_reflns_reduction_process ?

_reflns_number_total              5207
_reflns_number_observed           4189
_reflns_observed_criterion       'Inet > 2.5\s(Inet)'

_computing_data_collection       'Bruker SMART'
_computing_cell_refinement       'Bruker SAINT'
_computing_data_reduction        'Bruker SAINT/NRCVAX DATRD2'
_computing_structure_solution    'NRCVAX SOLVER'
_computing_structure_refinement  'NRCVAX LSTSQ'
_computing_molecular_graphics    'NRCVAX'
_computing_publication_material  'NRCVAX TABLES Jan 94 Version'

#===============================================================================

# 8. REFINEMENT DATA

_refine_special_details
;
 ?  #Insert any special details here.
;

_refine_ls_structure_factor_coef  F
_refine_ls_matrix_type            full
_refine_ls_weighting_scheme       calc
_refine_ls_weighting_details       1/(\s^2^(F)+0.0002F^2^)
_refine_ls_hydrogen_treatment     ?
_refine_ls_extinction_method      Larson
_refine_ls_extinction_coef         0.055(8)
_refine_ls_number_reflns          4187
_refine_ls_number_parameters       385
_refine_ls_number_restraints      ?
_refine_ls_number_constraints     ?
_refine_ls_R_factor_all           0.063
_refine_ls_R_factor_obs           0.047
_refine_ls_wR_factor_all          0.060
_refine_ls_wR_factor_obs          0.055
_refine_ls_goodness_of_fit_all    ?
_refine_ls_goodness_of_fit_obs    1.78
_refine_ls_restrained_S_all       ?
_refine_ls_restrained_S_obs       ?
_refine_ls_shift/esd_max          0.001
_refine_ls_shift/esd_mean         ?
_refine_diff_density_max          0.30
_refine_diff_density_min         -0.30

#===============================================================================

# 9. ATOMIC COORDINATES AND THERMAL PARAMETERS

loop_
     _atom_site_label
     _atom_site_fract_x
     _atom_site_fract_y
     _atom_site_fract_z
     _atom_site_U_iso_or_equiv
     _atom_site_thermal_displace_type
     _atom_site_calc_flag
     _atom_site_refinement_flags
     _atom_site_type_symbol
Cl1  0.08153(5)  0.69025(3)  0.12191(3)  0.03445(23)  Uani  ?   .  Cl
C1  0.62427(19)  0.53297(13)  0.35757(11)  0.0251(8)  Uani  ?   .  C
C2  0.70187(22)  0.50105(14)  0.44009(12)  0.0329(10)  Uani  ?   .  C
C3  0.7670(3)  0.58804(17)  0.48074(14)  0.0397(11)  Uani  ?   .  C
C4  0.87841(24)  0.61524(16)  0.41559(13)  0.0363(11)  Uani  ?   .  C
C5  0.87329(21)  0.53481(14)  0.35134(13)  0.0310(10)  Uani  ?   .  C
C6  0.74335(19)  0.54532(13)  0.29281(11)  0.0256(8)  Uani  ?   .  C
C7  0.83083(23)  0.45213(15)  0.40645(14)  0.0360(11)  Uani  ?   .  C
C8  0.74455(19)  0.47452(12)  0.22155(11)  0.0246(8)  Uani  ?   .  C
C9  0.84011(21)  0.48509(15)  0.15700(12)  0.0316(10)  Uani  ?   .  C
C10  0.85344(22)  0.42056(15)  0.09227(12)  0.0345(10)  Uani  ?   .  C
C11  0.76611(21)  0.34448(14)  0.08995(12)  0.0307(10)  Uani  ?   .  C
C12  0.66727(21)  0.33279(13)  0.15192(11)  0.0268(9)  Uani  ?   .  C
C13  0.65824(18)  0.39597(12)  0.21952(10)  0.0225(8)  Uani  ?   .  C
N14  0.56361(15)  0.38417(10)  0.28594(9)  0.0222(7)  Uani  ?   .  N
C15  0.50714(19)  0.46793(12)  0.32601(11)  0.0226(8)  Uani  ?   .  C
C16  0.48916(19)  0.29730(12)  0.29371(11)  0.0234(8)  Uani  ?   .  C
C17  0.48020(20)  0.26410(12)  0.38631(11)  0.0263(8)  Uani  ?   .  C
O18  0.54401(16)  0.29503(9)  0.44636(8)  0.0370(7)  Uani  ?   .  O
O19  0.39544(15)  0.19088(9)  0.38866(8)  0.0328(7)  Uani  ?   .  O
C20  0.3812(3)  0.14723(18)  0.47127(14)  0.0429(13)  Uani  ?   .  C
C21  0.34973(20)  0.30127(11)  0.24690(11)  0.0247(9)  Uani  ?   .  C
O22  0.33349(15)  0.28056(10)  0.17312(8)  0.0362(8)  Uani  ?   .  O
C23  0.11985(24)  0.35500(18)  0.25192(17)  0.0395(12)  Uani  ?   .  C
O23  0.25080(13)  0.33623(9)  0.29549(8)  0.0294(7)  Uani  ?   .  O
C24  0.40063(18)  0.52108(11)  0.27083(11)  0.0216(8)  Uani  ?   .  C
C25  0.39224(20)  0.51644(13)  0.18228(11)  0.0256(8)  Uani  ?   .  C
C26  0.29435(20)  0.56802(13)  0.13634(12)  0.0279(9)  Uani  ?   .  C
C27  0.20370(18)  0.62459(12)  0.17925(11)  0.0244(8)  Uani  ?   .  C
C28  0.20870(20)  0.63006(13)  0.26711(12)  0.0263(9)  Uani  ?   .  C
C29  0.30706(20)  0.57821(13)  0.31222(12)  0.0262(9)  Uani  ?   .  C
H2  0.6401(23)  0.4632(15)  0.4762(14)  0.039(6)  Uiso  ?  .  H
H3a  0.698(3)  0.6336(17)  0.4932(14)  0.043(6)  Uiso  ?  .  H
H3b  0.8120(24)  0.5726(15)  0.5356(15)  0.042(6)  Uiso  ?  .  H
H4a  0.8594(24)  0.6757(16)  0.3887(14)  0.044(6)  Uiso  ?  .  H
H4b  0.9734(24)  0.6187(14)  0.4426(13)  0.035(5)  Uiso  ?  .  H
H5  0.9608(23)  0.5275(14)  0.3184(13)  0.032(5)  Uiso  ?  .  H
H6  0.7411(20)  0.6077(14)  0.2656(12)  0.030(5)  Uiso  ?  .  H
H7  0.5800(19)  0.5953(12)  0.3671(11)  0.019(4)  Uiso  ?  .  H
H7a  0.8055(23)  0.3964(15)  0.3732(14)  0.037(6)  Uiso  ?  .  H
H7b  0.8968(22)  0.4370(14)  0.4527(13)  0.036(6)  Uiso  ?  .  H
H9  0.8995(22)  0.5382(14)  0.1603(12)  0.030(5)  Uiso  ?  .  H
H10  0.9213(21)  0.4284(14)  0.0498(13)  0.029(5)  Uiso  ?  .  H
H11  0.7718(22)  0.2968(14)  0.0443(14)  0.036(6)  Uiso  ?  .  H
H12  0.6028(21)  0.2813(14)  0.1462(12)  0.028(5)  Uiso  ?  .  H
H15  0.4590(19)  0.4468(12)  0.3784(11)  0.017(4)  Uiso  ?  .  H
H16  0.5444(18)  0.2505(12)  0.2660(11)  0.018(4)  Uiso  ?  .  H
H20a  0.471(3)  0.1299(20)  0.4949(19)  0.073(9)  Uiso  ?  .  H
H20b  0.333(3)  0.0968(21)  0.4649(17)  0.070(9)  Uiso  ?  .  H
H20c  0.339(3)  0.1887(20)  0.5078(19)  0.069(9)  Uiso  ?  .  H
H23a  0.060(3)  0.3755(18)  0.2960(16)  0.056(7)  Uiso  ?  .  H
H23b  0.085(3)  0.3007(18)  0.2231(16)  0.057(8)  Uiso  ?  .  H
H23c  0.129(3)  0.4057(18)  0.2113(16)  0.058(7)  Uiso  ?  .  H
H25  0.4529(21)  0.4743(14)  0.1527(12)  0.031(5)  Uiso  ?  .  H
H26  0.2880(22)  0.5682(14)  0.0758(14)  0.034(5)  Uiso  ?  .  H
H28  0.1440(22)  0.6685(14)  0.2962(13)  0.033(5)  Uiso  ?  .  H
H29  0.3133(23)  0.5831(15)  0.3729(15)  0.042(6)  Uiso  ?  .  H

loop_
     _atom_site_aniso_label
     _atom_site_aniso_U_11
     _atom_site_aniso_U_22
     _atom_site_aniso_U_33
     _atom_site_aniso_U_12
     _atom_site_aniso_U_13
     _atom_site_aniso_U_23
     _atom_site_aniso_type_symbol
Cl1 0.0303(3) 0.0340(3) 0.0389(3) 0.00937(20) -0.00241(20) 0.00609(20) Cl
C1 0.0254(10) 0.0265(9) 0.0232(9) 0.0031(8) -0.0031(7) -0.0010(7) C
C2 0.0359(12) 0.0393(11) 0.0232(9) -0.0049(9) -0.0050(8) 0.0021(8) C
C3 0.0403(14) 0.0493(13) 0.0290(11) -0.0014(11) -0.0118(9) -0.0059(10) C
C4 0.0325(12) 0.0381(12) 0.0374(11) -0.0029(9) -0.0153(9) 0.0005(9) C
C5 0.0243(11) 0.0355(10) 0.0330(10) 0.0007(8) -0.0079(8) 0.0009(8) C
C6 0.0242(10) 0.0262(9) 0.0263(9) -0.0006(7) -0.0037(7) 0.0030(7) C
C7 0.0365(13) 0.0340(11) 0.0366(11) 0.0034(9) -0.0167(9) 0.0042(9) C
C8 0.0220(10) 0.0289(9) 0.0228(8) 0.0028(7) -0.0028(7) 0.0050(7) C
C9 0.0251(11) 0.0392(11) 0.0303(10) -0.0047(9) -0.0014(8) 0.0071(8) C
C10 0.0273(11) 0.0509(13) 0.0255(9) 0.0022(9) 0.0054(8) 0.0047(9) C
C11 0.0307(11) 0.0377(11) 0.0238(9) 0.0088(9) 0.0021(8) 0.0015(8) C
C12 0.0292(11) 0.0267(9) 0.0245(9) 0.0050(8) 0.0006(7) 0.0024(7) C
C13 0.0203(9) 0.0259(9) 0.0211(8) 0.0056(7) -0.0010(7) 0.0045(7) C
N14 0.0243(8) 0.0212(7) 0.0213(7) 0.0015(6) 0.0030(6) 0.0008(6) N
C15 0.0237(10) 0.0235(8) 0.0208(8) 0.0029(7) 0.0016(7) -0.0001(7) C
C16 0.0253(10) 0.0226(8) 0.0224(9) 0.0026(7) 0.0028(7) 0.0005(7) C
C17 0.0292(11) 0.0246(9) 0.0253(9) 0.0042(8) 0.0010(7) 0.0035(7) C
O18 0.0456(9) 0.0381(8) 0.0268(7) -0.0059(7) -0.0083(6) 0.0061(6) O
O19 0.0442(9) 0.0308(7) 0.0235(6) -0.0068(6) -0.0003(6) 0.0058(5) O
C20 0.0624(18) 0.0384(13) 0.0280(11) -0.0120(12) 0.0016(11) 0.0111(10) C
C21 0.0289(10) 0.0199(8) 0.0253(9) -0.0028(7) 0.0016(7) 0.0032(7) C
O22 0.0374(9) 0.0470(8) 0.0240(7) -0.0062(7) -0.0009(6) -0.0042(6) O
C23 0.0264(12) 0.0404(12) 0.0515(14) 0.0017(9) -0.0024(10) 0.0036(11) C
O23 0.0247(7) 0.0327(7) 0.0309(7) 0.0025(6) 0.0010(5) -0.0007(5) O
C24 0.0192(9) 0.0206(8) 0.0248(8) -0.0024(7) 0.0006(7) 0.0006(7) C
C25 0.0256(10) 0.0278(9) 0.0235(9) 0.0057(8) 0.0027(7) 0.0014(7) C
C26 0.0290(11) 0.0312(10) 0.0234(9) 0.0044(8) -0.0003(7) 0.0016(8) C
C27 0.0204(9) 0.0222(8) 0.0306(9) -0.0001(7) -0.0016(7) 0.0046(7) C
C28 0.0230(10) 0.0247(9) 0.0313(10) 0.0018(7) 0.0032(8) -0.0027(7) C
C29 0.0264(10) 0.0276(9) 0.0245(9) 0.0000(7) 0.0008(7) -0.0018(7) C

#===============================================================================

# 10. MOLECULAR GEOMETRY

loop_
     _geom_bond_atom_site_label_1
     _geom_bond_atom_site_label_2
     _geom_bond_distance
     _geom_bond_site_symmetry_1
     _geom_bond_site_symmetry_2
     _geom_bond_publ_flag
  Cl(1) C(27) 1.7376(18)  ?  ?  ?
  C(1) C(2)   1.543(3)  ?  ?  ?
  C(1) C(6)   1.557(3)  ?  ?  ?
  C(1) C(15)  1.535(3)  ?  ?  ?
  C(2) C(3)   1.529(3)  ?  ?  ?
  C(2) C(7)   1.530(3)  ?  ?  ?
  C(3) C(4)   1.546(3)  ?  ?  ?
  C(4) C(5)   1.530(3)  ?  ?  ?
  C(5) C(6)   1.537(3)  ?  ?  ?
  C(5) C(7)   1.528(3)  ?  ?  ?
  C(6) C(8)   1.508(3)  ?  ?  ?
  C(8) C(9)   1.389(3)  ?  ?  ?
  C(8) C(13)  1.400(3)  ?  ?  ?
  C(9) C(10)  1.380(3)  ?  ?  ?
  C(10) C(11) 1.378(3)  ?  ?  ?
  C(11) C(12) 1.384(3)  ?  ?  ?
  C(12) C(13) 1.397(3)  ?  ?  ?
  C(13) N(14) 1.4072(22)  ?  ?  ?
  N(14) C(15) 1.4664(22)  ?  ?  ?
  N(14) C(16) 1.4448(23)  ?  ?  ?
  C(15) C(24) 1.5265(25)  ?  ?  ?
  C(16) C(17) 1.5275(24)  ?  ?  ?
  C(16) C(21) 1.512(3)  ?  ?  ?
  C(17) O(18) 1.1937(23)  ?  ?  ?
  C(17) O(19) 1.3314(23)  ?  ?  ?
  O(19) C(20) 1.4443(23)  ?  ?  ?
  C(21) O(22) 1.1968(22)  ?  ?  ?
  C(21) O(23) 1.3299(22)  ?  ?  ?
  C(23) O(23) 1.442(3)  ?  ?  ?
  C(24) C(25) 1.3853(24)  ?  ?  ?
  C(24) C(29) 1.3890(25)  ?  ?  ?
  C(25) C(26) 1.384(3)  ?  ?  ?
  C(26) C(27) 1.378(3)  ?  ?  ?
  C(27) C(28) 1.374(3)  ?  ?  ?
  C(28) C(29) 1.383(3)  ?  ?  ?

loop_
     _geom_contact_atom_site_label_1
     _geom_contact_atom_site_label_2
     _geom_contact_distance
     _geom_contact_site_symmetry_1
     _geom_contact_site_symmetry_2
     _geom_contact_publ_flag
    ?   ?   ?   ?   ?   ?

loop_
     _geom_angle_atom_site_label_1
     _geom_angle_atom_site_label_2
     _geom_angle_atom_site_label_3
     _geom_angle
     _geom_angle_site_symmetry_1
     _geom_angle_site_symmetry_2
     _geom_angle_site_symmetry_3
     _geom_angle_publ_flag
  C(2) C(1) C(6)    103.21(15)  ?  ?  ?  ?
  C(2) C(1) C(15)   115.04(15)  ?  ?  ?  ?
  C(6) C(1) C(15)   113.97(14)  ?  ?  ?  ?
  C(1) C(2) C(3)    106.79(17)  ?  ?  ?  ?
  C(1) C(2) C(7)    103.22(15)  ?  ?  ?  ?
  C(3) C(2) C(7)    100.99(18)  ?  ?  ?  ?
  C(2) C(3) C(4)    102.51(17)  ?  ?  ?  ?
  C(3) C(4) C(5)    103.27(17)  ?  ?  ?  ?
  C(4) C(5) C(6)    109.18(16)  ?  ?  ?  ?
  C(4) C(5) C(7)    102.81(17)  ?  ?  ?  ?
  C(6) C(5) C(7)    100.77(16)  ?  ?  ?  ?
  C(1) C(6) C(5)    101.67(14)  ?  ?  ?  ?
  C(1) C(6) C(8)    114.97(15)  ?  ?  ?  ?
  C(5) C(6) C(8)    110.60(15)  ?  ?  ?  ?
  C(2) C(7) C(5)     93.83(16)  ?  ?  ?  ?
  C(6) C(8) C(9)    118.65(17)  ?  ?  ?  ?
  C(6) C(8) C(13)   123.00(15)  ?  ?  ?  ?
  C(9) C(8) C(13)   118.28(17)  ?  ?  ?  ?
  C(8) C(9) C(10)   122.25(19)  ?  ?  ?  ?
  C(9) C(10) C(11)  118.96(18)  ?  ?  ?  ?
  C(10) C(11) C(12) 120.44(19)  ?  ?  ?  ?
  C(11) C(12) C(13) 120.45(19)  ?  ?  ?  ?
  C(8) C(13) C(12)  119.51(16)  ?  ?  ?  ?
  C(8) C(13) N(14)  118.29(15)  ?  ?  ?  ?
  C(12) C(13) N(14) 122.19(16)  ?  ?  ?  ?
  C(13) N(14) C(15) 117.96(14)  ?  ?  ?  ?
  C(13) N(14) C(16) 119.78(14)  ?  ?  ?  ?
  C(15) N(14) C(16) 118.88(14)  ?  ?  ?  ?
  C(1) C(15) N(14)  111.09(14)  ?  ?  ?  ?
  C(1) C(15) C(24)  110.71(14)  ?  ?  ?  ?
  N(14) C(15) C(24) 114.81(14)  ?  ?  ?  ?
  N(14) C(16) C(17) 112.88(15)  ?  ?  ?  ?
  N(14) C(16) C(21) 111.22(14)  ?  ?  ?  ?
  C(17) C(16) C(21) 113.55(15)  ?  ?  ?  ?
  C(16) C(17) O(18) 126.01(17)  ?  ?  ?  ?
  C(16) C(17) O(19) 108.76(15)  ?  ?  ?  ?
  O(18) C(17) O(19) 125.12(16)  ?  ?  ?  ?
  C(17) O(19) C(20) 116.05(16)  ?  ?  ?  ?
  C(16) C(21) O(22) 123.31(17)  ?  ?  ?  ?
  C(16) C(21) O(23) 112.11(15)  ?  ?  ?  ?
  O(22) C(21) O(23) 124.43(18)  ?  ?  ?  ?
  C(21) O(23) C(23) 115.45(16)  ?  ?  ?  ?
  C(15) C(24) C(25) 124.15(15)  ?  ?  ?  ?
  C(15) C(24) C(29) 117.76(15)  ?  ?  ?  ?
  C(25) C(24) C(29) 118.08(16)  ?  ?  ?  ?
  C(24) C(25) C(26) 120.93(17)  ?  ?  ?  ?
  C(25) C(26) C(27) 119.57(17)  ?  ?  ?  ?
  Cl(1) C(27) C(26) 119.80(14)  ?  ?  ?  ?
  Cl(1) C(27) C(28) 119.35(14)  ?  ?  ?  ?
  C(26) C(27) C(28) 120.85(17)  ?  ?  ?  ?
  C(27) C(28) C(29) 118.99(17)  ?  ?  ?  ?
  C(24) C(29) C(28) 121.57(17)  ?  ?  ?  ?

loop_
     _geom_torsion_atom_site_label_1
     _geom_torsion_atom_site_label_2
     _geom_torsion_atom_site_label_3
     _geom_torsion_atom_site_label_4
     _geom_torsion
     _geom_torsion_site_symmetry_1
     _geom_torsion_site_symmetry_2
     _geom_torsion_site_symmetry_3
     _geom_torsion_site_symmetry_4
     _geom_torsion_publ_flag
    ?   ?   ?   ?   ?   ?   ?   ?   ?   ?

#===============================================================================
# Additional structures (sections 5-10 and associated data_? identifiers)
# may be added at this point.
#===============================================================================

# The following lines are used to test the character set of files sent by
# network email or other means. They are not part of the CIF data set.
# abcdefghijklmnopqrstuvwxyzABCDEFGHIJKLMNOPQRSTUVWXYZ0123456789
# !@#$%^&*()_+{}:"~<>?|\-=[];,./
